# Supplementary material for: Chrysoviruses Inhabited Symbiotic Fungi of Lichens
Source: Viruses. 2019 Dec 3;11(12):1120. doi: 10.3390/v11121120 (PMC6949994; doi:10.3390/v11121120)
Supplement: Supplementary file 1 [file viruses-11-01120-s001.pdf]

## Supplementary material

| primer          | 5'-3' sequence                            | template        | position        | reference            |
|-----------------|-------------------------------------------|-----------------|-----------------|----------------------|
| oligo(dT)       | GGCCACGCGTCGACTAGTACTCGAGTTTTTTTTTTTTTTTT |                 | 3' poly(A) tail |                      |
| tagged random   | CGATCGATCATGATGCAATGCNNNNNN               |                 |                 | Darissa et al. 2010  |
| single specific | CGATCGATCATGATGCAATGC                     |                 |                 | Darissa et al. 2010  |
| 2381            | CATGTTCTGTATCACTAACC                      | RNA1            | 448r            |                      |
| 2382            | CCATACTTGTAAGGCTAAATGTG                   | RNA1            | 407r            |                      |
| 647             | GGCAGGAAGATACCAAGAGTTTATACAG              | RNA1            | 3165f           |                      |
| 876             | CAGTCAGTAAGGAAGAATTAGCGCA                 | RNA1            | 3215f           |                      |
| 554             | AACCTATACACATCTTATCTTCAGCCAA              | RNA2            | 478r            |                      |
| 715             | CATAGTACATTTGGTAACCTATACACATC             | RNA2            | 493r            |                      |
| 618             | AGACAGTATATCAGGAAATGCCGAC                 | RNA2            | 2850f           |                      |
| 875             | AAGTGAGCGACCAAGTTAACCAAG                  | RNA2            | 2907f           |                      |
| 2298            | AGCCATTTCACTCTTTGTAAATTGTGG               | RNA3            | 320r            |                      |
| 619             | CCTATATTTCTTCTCTGCTTACC                   | RNA3            | 287r            |                      |
| 620             | CTGTGGTGGCTTAGGTTAATGG                    | RNA3            | 2450f           |                      |
| 2616            | AAAGTTGAGCGAAAGACAC                       | RNA3            | 2516f           |                      |
| 566             | TCCTCTACACAATCAATCACCTCT                  | RNA4            | 263r            |                      |
| 568             | TGATGCTGGCTGATAAAGAAAC                    | RNA4            | 2435f           |                      |
| 648             | TTACAATGATGGAACGCAAGATCAG                 | RNA4            | 2472f           |                      |
| 846             | GTTGTATGGGGTAGTGGAACAAAGGATAAACGGTT       | RNA4            | 2017f           |                      |
| 847             | TCGTATCACCTGCCCTATCCTACCGTG               | RNA4            | 2338r           |                      |
| 2352            | AAGCATGCATTCATTAATAAGGA                   | RNA1            | 1365f           |                      |
| 2340            | GAATAGCCTGATCAAGATCTG                     | RNA1            | 1606r           |                      |
| 1901            | TCGTCGCCGTAACGACCCC                       | GAPDH           |                 |                      |
| 1902            | CGCCCTTGAACCTGGCCGTGT                     | GAPDH           |                 |                      |
| ITS1            | TCCGTAGGTGAACCTGCGG                       | ITS             |                 | White et al. 1990    |
| ITS4            | TCCTCCGCTTATTGATATGC                      | ITS             |                 | White et al. 1990    |
| MY1574          | Cy3-TCCTCGTTGAAGAGC                       | universal fungi |                 | Baschien et al. 2008 |
| Cy3-859         | Cy3-GGGCAAATAGAGAGAAGG                    | RNA3            |                 |                      |

**Supplementary Table 1.** Primers and probes used in this work

| virus                                        | acronym | AC RNA1      | AC RNA2      | AC RNA3      | AC RNA4      |
|----------------------------------------------|---------|--------------|--------------|--------------|--------------|
| Alternaria alternata chrysovirus             |         | YP_009553287 | QBA82441     |              |              |
| Amasya cherry disease associated chrysovirus | ACDAC   | YP_001531163 | NC_009946    |              | YP_001531161 |
| Anturium mosaic-associated chrysovirus       |         | ACU11563     | FJ899676     |              |              |
| Aspergillus fumigatus chrysovirus            | AfuCV   | FN178512     | CAX48751     | YP_009508103 | YP_009508106 |
| Beauveria bassiana chrysovirus 1             | BbCV1   |              |              | AZT88573     | AZT88574     |
| Bipolaris maydis chrysovirus                 | BmCV1   |              |              |              | ARM36037     |
| Botryosphaeria dothidea chrysovirus          |         | AJD14830     | AJD14831     |              |              |
| Brassica campestris chrysovirus              | BrcCV1  | AKU48197     | KP782030     |              |              |
| Colletotrichum fructicola chrysovirus 1      |         | YP_009551629 | YP_009551635 |              |              |
| Colletotrichum gloeosporioides chrysovirus 1 | CgCV1   | ALW95408     | ALW95409     |              | ALW95410     |
| Cryphonectria nitschkei chrysovirus 1        | CnCV1   | ACT79255     | ACT79251     |              | ABI20757     |
| Fusarium oxysporum f.sp. dianthi mycovirus 1 |         | YP_009158913 |              |              |              |
| Grapevine chrysovirus                        | GrCV1   |              |              |              | AFX73020     |
| Helminthosporium victoriae virus 145S        | HvV145S | AF297176     | AF297177     |              |              |
| Chrysothrix chrysovirus 1                    | CcCV1   | MN625832     | MN625833     | MN625834     | MN625835     |
| Isaria javanica chrysovirus                  | IjCV    | YP_009337840 | APR73429     | YP_009337890 | YP_009337841 |
| Lepraria chrysovirus 1                       | LiCV1   | MN393162     | MN393161     |              | MN393163     |
| Macrophomina phaseolina chrysovirus          | MpCHrV1 | ALD89090     | ALD89091     | ALD89092     | ALD89093     |
| Penicillium chrysogenum virus                | PcV     | AF296439     | YP_392483    | YP_392484    | YP_392485    |
| Penicillium italicum chrysovirus             |         |              | QCZ35877     |              |              |
| Penicillium raistrickii chrysovirus 1        | PrCV1   | AZT88567     | AZT88568     | AZT88569     | AZT88570     |
| Penicillium roseopurpureum chrysovirus       | ProCV   | AYP71812     | AYP71813     | AYP71814     | AYP71815     |
| Persea americana chrysovirus                 |         | AJA37498     | AJA37499     |              |              |
| Raphanus sativus chrysovirus                 | RasCV1  | AFE83590     | AFE83591     |              |              |
| Verticillium dahliae chrysovirus 1           | VdCV1   | ADG21213     | ADG21214     |              | YP_009507947 |

**Supplementary Table 2.** Viruses and sequences used in this paper

|         | PrCV1 | PcV | ProCV | AfuCV | BbCV1 | IjCV | CcCV1 | MpCHrV1 |
|---------|-------|-----|-------|-------|-------|------|-------|---------|
| PrCV1   |       | 60  | 54    | 34    | 23    | 23   | 23    | 17      |
| PcV     | 60    |     | 52    | 34    | 23    | 23   | 23    | 17      |
| ProCV   | 54    | 52  |       | 34    | 23    | 22   | 23    | 16      |
| AfuCV   | 34    | 34  | 34    |       | 21    | 22   | 24    | 20      |
| BbCV1   | 23    | 23  | 23    | 21    |       | 52   | 22    | 19      |
| IjCV    | 23    | 23  | 22    | 22    | 52    |      | 22    | 19      |
| CcCV1   | 23    | 23  | 23    | 24    | 22    | 22   |       | 17      |
| MpCHrV1 | 17    | 17  | 16    | 20    | 19    | 19   | 17    |         |

**Supplementary Figure 1.** Amino acid sequence identity and heat map of protein encoded on RNA3 segment.

|         | CnCV1 | VdCV1 | PrCV1 | PcV | ProCV | AfuCV | CcCV1 | BbCV1 | IjCV | GrCV | MpCHrV1 | BmCV1 | ACDACV | CgCV1 |
|---------|-------|-------|-------|-----|-------|-------|-------|-------|------|------|---------|-------|--------|-------|
| CnCV1   |       | 55    | 28    | 27  | 27    | 29    | 28    | 27    | 29   | 30   | 31      | 23    | 21     | 22    |
| VdCV1   | 55    |       | 30    | 30  | 29    | 30    | 29    | 30    | 30   | 32   | 34      | 25    | 21     | 25    |
| PrCV1   | 28    | 30    |       | 88  | 82    | 70    | 44    | 41    | 41   | 43   | 37      | 24    | 22     | 24    |
| PcV     | 27    | 30    | 88    |     | 81    | 69    | 43    | 41    | 40   | 43   | 37      | 24    | 22     | 23    |
| ProCV   | 27    | 29    | 82    | 81  |       | 69    | 43    | 40    | 40   | 43   | 37      | 24    | 22     | 23    |
| AfuCV   | 29    | 30    | 70    | 69  | 69    |       | 45    | 41    | 40   | 44   | 39      | 24    | 22     | 23    |
| CcCV1   | 28    | 29    | 44    | 43  | 43    | 45    |       | 40    | 40   | 43   | 39      | 24    | 25     | 23    |
| BbCV1   | 27    | 30    | 41    | 41  | 40    | 41    | 40    |       | 74   | 49   | 36      | 25    | 21     | 22    |
| IjCV    | 29    | 30    | 41    | 40  | 40    | 40    | 40    | 74    |      | 49   | 36      | 25    | 22     | 23    |
| GrCV    | 30    | 32    | 43    | 43  | 43    | 44    | 43    | 49    | 49   |      | 41      | 27    | 24     | 25    |
| MpCHrV1 | 31    | 34    | 37    | 37  | 37    | 39    | 39    | 36    | 36   | 41   |         | 25    | 23     | 24    |
| BmCV1   | 23    | 25    | 24    | 24  | 24    | 24    | 24    | 25    | 25   | 27   | 25      |       | 31     | 28    |
| ACDACV  | 21    | 21    | 22    | 22  | 22    | 22    | 25    | 21    | 22   | 24   | 23      | 31    |        | 25    |
| CgCV1   | 22    | 25    | 24    | 23  | 23    | 23    | 23    | 22    | 23   | 25   | 24      | 28    | 25     |       |

**Supplementary Figure 2.** Amino acid sequence identity and heat map of protein encoded by RNA4 segment.

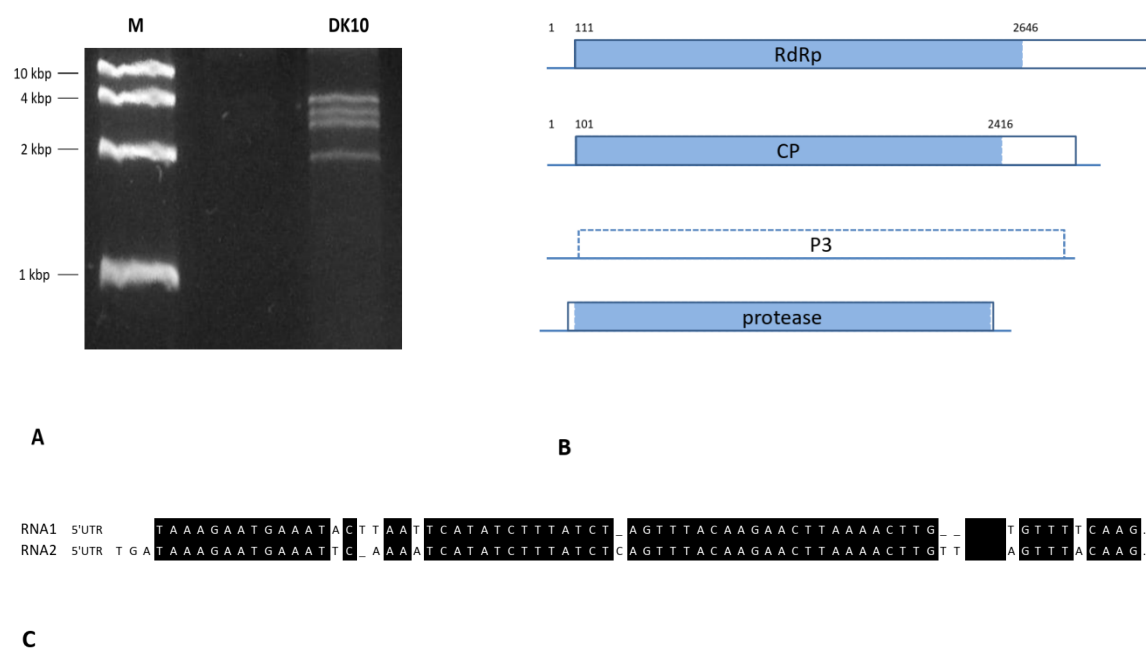

**Supplementary Figure 3.** (A) Agarose gel separation of dsRNA extracted from DK10 lichen sample. Marker - 10 kbp, 4 kbp, 2 kbp, 1 kbp. (B) Sequenced regions of LiCV1 chrysovirus from DK10 sample. Blue rectangles represent position of sequenced regions. (C) Alignment of 5'UTR sequences of RNA1 and RNA2 segments of LiCV1.
